# Supplementary material for: Human Umbilical Cord Mesenchymal Stem Cell-Derived Exosomes Rescue Testicular Aging
Source: MDPI journal article supplement (doi:10.3390/biomedicines12010098), 2024-01-03
Supplement: s1 [file s1]

**Table S2. Primers used for qRT-PCR analysis.**

| <b>Gene</b>    | <b>Forward Primer</b>   | <b>Reverse Primer</b>   |
|----------------|-------------------------|-------------------------|
| <i>Dazl</i>    | ATGTCTGCCACAACCTCTGAG   | CTGATTTCGGTTTCATCCATCCT |
| <i>Uchl1</i>   | GATGCTGAACAAAGTGTTGGC   | GGAGTTTCCGATGGTCTGCTT   |
| <i>Utf1</i>    | TGTCCCGGTGACTACGTCT     | CCCAGAAGTAGCTCCGTCTCT   |
| <i>Sycp3</i>   | AGCCAGTAACCAGAAAATTGAGC | CCACTGCTGCAACACATTCATA  |
| <i>Tex101</i>  | ATCTTTCTTCTAATCGCCTCACG | GCTCAGCCTTTGAAGTCCAGT   |
| <i>Pttg1</i>   | TCTGATCCGCTGTACTCTCCT   | AGGCGGCAATTCAACATCCA    |
| <i>Acrv1</i>   | TCAGCAACTTTCAAGCGAGTAT  | CTCCTGAAGAGTGCTCACCTG   |
| <i>Tssk1</i>   | CTCAAGCGACGAGGCTACATC   | ACCGCCACGTTGAACTTTAGG   |
| <i>Spacal</i>  | CCCGAGTCCGAAACCACAG     | ACAACACACTTGGATTACCTC   |
| <i>Tnp2</i>    | TCACACCAGTAACCAGTGCAA   | CCCTGAGCTACGCCTCTTAG    |
| <i>Prm2</i>    | ATGGTTTCGCTACCGAATGAGG  | CTCCGCCTTCTGCATGACC     |
| <i>Best1</i>   | ACACAACACATTCTGGGTGC    | CGCAAAGTACACACCTCATTCA  |
| <i>Star</i>    | ATGTTCTCTGCTACGTTCAAG   | CCCAGTGCTCTCCAGTTGAG    |
| <i>Hsd3b1</i>  | TGGACAAAGTATTCCGACCAGA  | GGCACACTTGCTTGAACACAG   |
| <i>Cyp11a1</i> | AGGTCCTCAATGAGATCCCTT   | TCCCTGTAAATGGGGCCATAC   |
| <i>Cyp17a1</i> | GCCCAAGTCAAAGACACCTAAT  | GTACCCAGGCGAAGAGAATAGA  |
| <i>Hsd17b3</i> | AGGTTCTCGCAGCACCTTTTT   | CATCGCCTGCTCCGGTAATC    |
| <i>Nr5a1</i>   | CCCAAGAGTTAGTGCTCCAGT   | CTGGGCGTCCTTTACGAGG     |
| <i>Insl3</i>   | TCCTGGCTATGTCATTGC      | TGTGGTCCTTGCTTACTG      |
| <i>Il-1b</i>   | GAAATGCCACCTTTTGACAGTG  | TGGATGCTCTCATCAGGACAG   |
| <i>Il-6</i>    | AGTCCGGAGAGGAGACTTCA    | ATTCCACGATTTCACAGAG     |
| <i>Tnf</i>     | CAGGCGGTGCCTATGTCTC     | CGATCACCCGAAGTTCAGTAG   |
| <i>Ccl2</i>    | TTAAAAACCTGGATCGGAACCAA | GCATTAGCTTCAGATTTACGGGT |
| <i>Ccl7</i>    | CCACATGCTGCTATGTCAAGA   | ACACCGACTACTGGTGATCCT   |
| <i>Nos2</i>    | GTTCTCAGCCCAACAATACAAGA | GTGGACGGGTGCATGTCAC     |
| <i>Il-4</i>    | GGTCTCAACCCCCAGCTAGT    | GCCGATGATCTCTCTCAAGTGAT |
| <i>Il-10</i>   | CTTACTGACTGGCATGAGGATCA | GCAGCTCTAGGAGCATGTGG    |
| <i>Ccl17</i>   | TACCATGAGGTCACCTCAGATGC | GCACTCTCGGCCTACATTGG    |
| <i>Gapdh</i>   | AGGTCGGTGTGAACGGATTTG   | TGTAGACCATGTAGTTGAGGTCA |
