# Supplementary material for: Human Umbilical Cord Mesenchymal Stem Cell-Derived Exosomes Rescue Testicular Aging
Source: MDPI journal article supplement (doi:10.3390/biomedicines12010098), 2024-01-03
Supplement: s1 [file s1]

**Table S1. Antibodies used for immunofluorescent staining and western blot.**

| <b>Antibodies</b>                                                 |               |                |
|-------------------------------------------------------------------|---------------|----------------|
| IgG mouse monoclonal anti-CD9 (WB 1:1000)                         | Abcam         | Cat#ab236630   |
| IgG mouse monoclonal anti-TSG101 (WB 1:1000)                      | ABclonal      | Cat#A2216      |
| IgG mouse monoclonal anti-CALNEXIN (WB 1:1000)                    | ABclonal      | Cat#A4846      |
| IgG rabbit polyclonal anti-LAMINB1 (IF 1:200)                     | GeneTex       | Cat#GTX03695   |
| IgG rabbit polyclonal anti-PCNA (IF 1:200)                        | GeneTex       | Cat#GTX100539  |
| IgG rabbit polyclonal anti-DDX4 (IF 1:400)                        | GeneTex       | Cat#GTX116575  |
| PNA (IF 1:400)                                                    | Sigma-Aldrich | Cat#L7381      |
| IgG rabbit polyclonal anti-STRA8 (IF 1:200)                       | Thermo Fisher | Cat#PA5-115977 |
| IgG mouse polyclonal anti-CYP17A1 (IF 1:200)                      | GeneTex       | Cat#GTX56294   |
| IgG rabbit polyclonal anti-HSD3B1 (IF 1:200)                      | Thermo Fisher | Cat#PA5-119789 |
| IgG Goat polyclonal Anti-rabbit, Alexa 594 (IF 1:1000)            | Thermo Fisher | Cat#A-11001    |
| IgG Goat polyclonal Anti-mouse, Alexa 488 (IF 1:1000)             | Thermo Fisher | Cat#A-11029    |
| IgG Goat anti-mouse Cross-Adsorbed Secondary Antibody (WB 1:1000) | Thermo Fisher | Cat#G-21060    |

Abcam (Boston, MA, USA); ABclonal (Wuhan, China); GeneTex (Alton Pkwy, Irvine, CA, USA);

Sigma-Aldrich (St. Louis, MO, USA); Thermo Fisher (Waltham, MA, USA).
